# Supplementary material
Source: PubMed Central journal article supplement (PMC3594483)
Supplement: NIHMS430502-supplement-1.pdf [file NIHMS430502-supplement-1.pdf]

## Activating mutations in the *NT5C2* nucleotidase gene drive chemotherapy resistance in relapsed ALL

Gannie Tzoneva, Arianne Perez Garcia, Zachary Carpenter, Hossein Khiabani, Valeria Tosello, Maddalena Allegretta, Elisabeth Paietta, Janis Racevskis, Jacob M. Rowe, Martin S. Tallman, Maddalena Paganin, Giuseppe Basso, Jana Hof, Renate Kirschner-Schwabe, Teresa Palomero, Raul Rabadan and Adolfo Ferrando

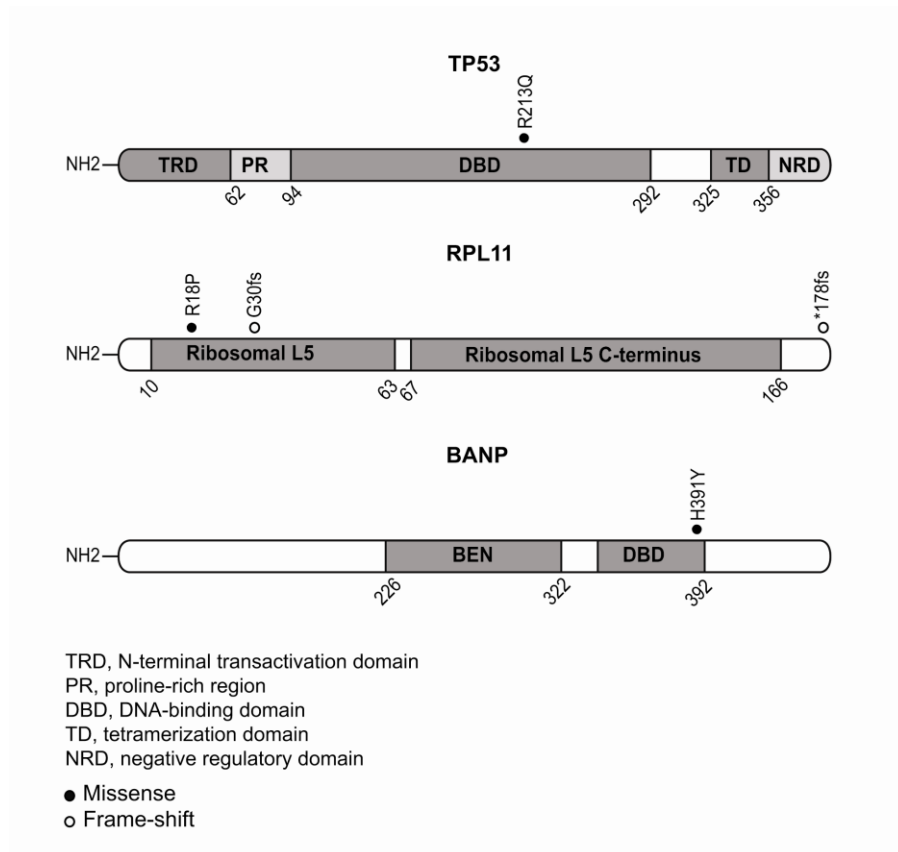

### Supplementary Figure 1. *TP53*, *RPL11* and *BANP* mutations in relapsed pediatric T-ALL.

Schematic representation of the structure of the *TP53*, *RPL11* and *BANP* proteins. Missense mutations identified in these genes in relapsed pediatric patients are indicated with filled circles. Open circles represent frameshift mutations.

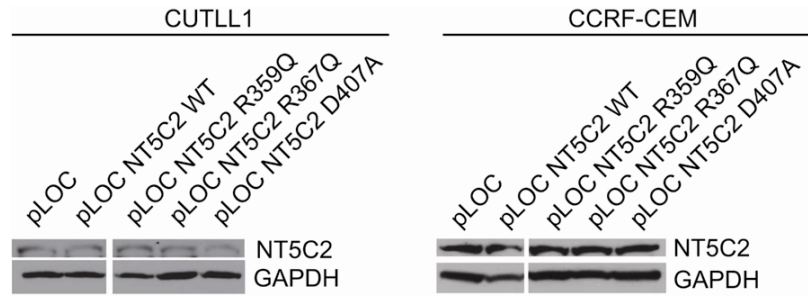

**Supplementary Figure 2. Western blot analysis of NT5C2 expression in CCRF-CEM and CUTLL1 cells transduced with wild type and mutant NT5C2 expressing lentiviruses.**

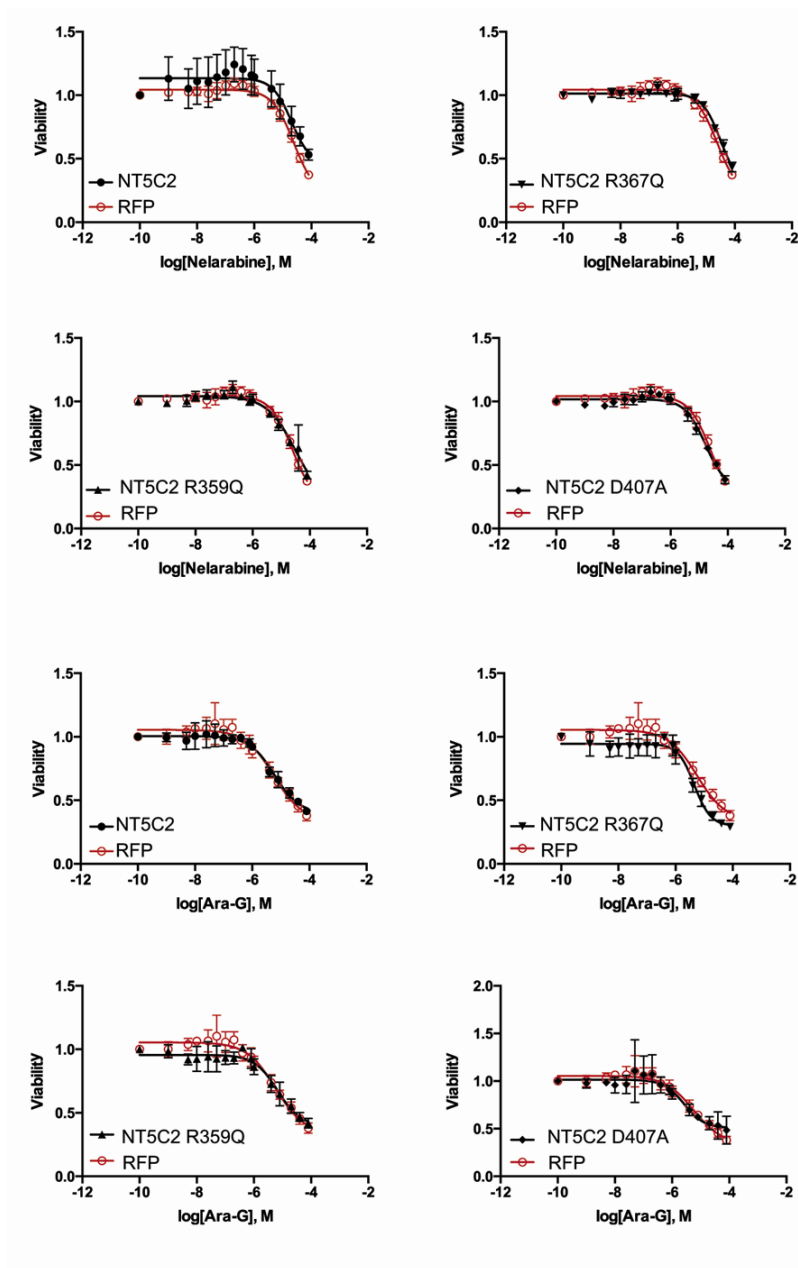

Supplementary Figure 3. Nelarabine and ara-G dose response cell viability curves in CCRF-CEM cells expressing wild type and mutant forms of NT5C2 compared to a red fluorescent protein empty vector control (RFP). Data is shown as means  $\pm$  s.d.

**Supplementary Table 1. Summary of patient samples and molecular assays**

| <b>Cohort</b>                               | <b>N</b> | <b>Source</b>                                                                        | <b>Analyses</b>                                                                               |
|---------------------------------------------|----------|--------------------------------------------------------------------------------------|-----------------------------------------------------------------------------------------------|
| T-ALL diagnostic/remission/relapse samples* | 5        | AIEOP (University of Padua)                                                          | Whole exome sequencing                                                                        |
| T-ALL diagnostic/remission/relapse Samples* | 18       | AIEOP (University of Padua)                                                          | <i>TP53</i> , <i>BANP</i> ,<br><i>RPL11</i> , <i>NRAS</i> ,<br><i>NT5C2</i> mutation analysis |
| T-ALL relapse samples*                      | 80       | AIEOP (University of Padua)(n=13)<br>BFM (Charité-Universitätsmedizin Berlin) (n=67) | <i>NT5C2</i> mutation analysis                                                                |
| B-precursor relapse ALL samples             | 35       | AIEOP (University of Padua)                                                          | <i>NT5C2</i> mutation analysis                                                                |
| Diagnostic T-ALL samples                    | 23       | ECOG                                                                                 | <i>NT5C2</i> mutation analysis                                                                |
| Diagnostic B-precursor ALL samples          | 27       | AIEOP (University of Padua)                                                          | <i>NT5C2</i> mutation analysis                                                                |

\* A total of 103 Relapse T-ALL samples were analyzed for *NT5C2* mutations: 36 (5+18+13) AIEOP (University of Padua) samples + 67 BFM (Charité-Universitätsmedizin Berlin) samples

**Supplementary Table 2. Mutations identified by exome sequencing in diagnosis and relapse T-ALL**

| Sample ID       | Gene            | Position (in coding sequence) | Transcript ID   | Predicted amino acid change | Mutated at diagnosis | Mutated at relapse |
|-----------------|-----------------|-------------------------------|-----------------|-----------------------------|----------------------|--------------------|
| T-ALL 11        | <i>CASQ1</i>    | 1033C>A                       | ENST00000368079 | Q339K                       | yes                  | no                 |
|                 | <i>CD163L1</i>  | 526G>A                        | ENST00000396630 | W176*                       | yes                  | no                 |
|                 | <i>CTTNBP2</i>  | 1966C>T                       | ENST00000160373 | L656F                       | yes                  | no                 |
|                 | <i>NOS1</i>     | 1777T>G                       | ENST00000317775 | Y593D                       | yes                  | no                 |
|                 | <i>DCST1</i>    | 492C>A                        | ENST00000423025 | N164K                       | yes                  | yes                |
|                 | <i>SYT16</i>    | 992A>G                        | ENST00000430451 | E331G                       | yes                  | yes                |
|                 | <i>AFF1</i>     | 985G>T                        | ENST00000307808 | V329L                       | no                   | yes                |
|                 | <i>NT5C2</i>    | 1075A>C                       | ENST00000404739 | K359Q                       | no                   | yes                |
| T-ALL 16        | <i>ACP2</i>     | 121C>T                        | ENST00000256997 | R41C                        | yes                  | yes                |
|                 | <i>COL4A2</i>   | 2816G>T                       | ENST00000360467 | R939I                       | yes                  | yes                |
|                 | <i>CTCF</i>     | 1208-1delG                    | ENST00000264010 | splicing                    | yes                  | yes                |
|                 | <i>FBXW7</i>    | 1040G>A                       | ENST00000296555 | R347H                       | yes                  | yes                |
|                 | <i>IGFL1</i>    | 320G>A                        | ENST00000437936 | R107H                       | yes                  | yes                |
|                 | <i>MAPK13</i>   | 688G>A                        | ENST00000211287 | D230N                       | yes                  | yes                |
|                 | <i>NKTR</i>     | 4339C>T                       | ENST00000232978 | R1447*                      | yes                  | yes                |
|                 | <i>SEPSECS</i>  | 1003G>A                       | ENST00000302922 | V335M                       | yes                  | yes                |
|                 | <i>VCPIP1</i>   | 1280T>A                       | ENST00000310421 | I427N                       | yes                  | yes                |
|                 | <i>WT1</i>      | 1091C>A                       | ENST00000452863 | S364*                       | yes                  | yes                |
|                 | <i>A4GALT</i>   | 974G>A                        | ENST00000249005 | R325Q                       | no                   | yes                |
|                 | <i>CCKBR</i>    | 1306C>T                       | ENST00000334619 | L436F                       | no                   | yes                |
|                 | <i>CNN3</i>     | 521C>G                        | ENST00000370206 | A174G                       | no                   | yes                |
|                 | <i>GPR151</i>   | 701G>A                        | ENST00000311104 | T234I                       | no                   | yes                |
|                 | <i>PTGS1</i>    | 1744delC                      | ENST00000362012 | P582fs                      | no                   | yes                |
|                 | <i>SPAG17</i>   | 6141+2A>G                     | ENST00000336338 | splicing                    | no                   | yes                |
|                 | <i>TP53</i>     | 638G>A                        | ENST00000269305 | R213Q                       | no                   | yes                |
|                 | T-ALL 38        | <i>AKAP1</i>                  | 926delG         | ENST00000337714             | S309fs               | yes                |
| <i>C17orf80</i> |                 | 1017C>T                       | ENST00000268942 | T306M                       | yes                  | yes                |
| <i>DNM2</i>     |                 | 235+1G>C                      | ENST00000355667 | splicing                    | yes                  | yes                |
| <i>TBCK</i>     |                 | 599C>A                        | ENST00000361687 | T200N                       | yes                  | yes                |
| <i>ROCK1</i>    |                 | 1638+1G>T                     | ENST00000399799 | splicing                    | no                   | yes                |
| T-ALL 47        | <i>CAPN9</i>    | 1403G>A                       | ENST00000354537 | R468Q                       | yes                  | no                 |
|                 | <i>CMBL</i>     | 482C>A                        | ENST00000296658 | S161Y                       | yes                  | no                 |
|                 | <i>EPHA3</i>    | 1621C>T                       | ENST00000336596 | Q541*                       | yes                  | no                 |
|                 | <i>PRKCSH</i>   | 1199G>C                       | ENST00000412601 | G400A                       | yes                  | no                 |
|                 | <i>SHROOM3</i>  | 116G>T                        | ENST00000296043 | G39V                        | yes                  | no                 |
|                 | <i>SLC12A5</i>  | 1167A>T                       | ENST00000243964 | E556V                       | yes                  | no                 |
|                 | <i>USP7</i>     | 640G>C                        | ENST00000344836 | V214L                       | yes                  | no                 |
|                 | <i>ZMYND11</i>  | 527A>G                        | ENST00000402736 | E175G                       | yes                  | no                 |
|                 | <i>BANP</i>     | 1171C>T                       | ENST00000393208 | H391Y                       | no                   | yes                |
|                 | <i>KDR</i>      | 3686G>A                       | ENST00000263923 | R1229Q                      | no                   | yes                |
|                 | <i>MLLT4</i>    | 2957A>G                       | ENST00000392108 | Y986C                       | no                   | yes                |
|                 | <i>MLLT4</i>    | 3350G>A                       | ENST00000392108 | R1116H                      | no                   | yes                |
|                 | <i>RBM47</i>    | 210delC                       | ENST00000381793 | G70fs                       | no                   | yes                |
|                 | <i>SOX6</i>     | 1633C>T                       | ENST00000316399 | R545C                       | no                   | yes                |
| T-ALL 49        | <i>CDC42EP1</i> | 757delC                       | ENST00000249014 | P253fs                      | yes                  | no                 |
|                 | <i>DNM2</i>     | 2308C>T                       | ENST00000359692 | R770*                       | yes                  | no                 |
|                 | <i>EXTL1</i>    | 939G>A                        | ENST00000374280 | W313*                       | yes                  | no                 |
|                 | <i>SACS</i>     | 2785C>T                       | ENST00000382292 | R929C                       | yes                  | no                 |
|                 | <i>SERPINB4</i> | 1057G>A                       | ENST00000341074 | E353K                       | yes                  | no                 |
|                 | <i>WEE1</i>     | 1210A>G                       | ENST00000299613 | M404V                       | yes                  | no                 |
|                 | <i>ASPM</i>     | 8957C>T                       | ENST00000367409 | R2853W                      | yes                  | yes                |
|                 | <i>SHROOM3</i>  | 5279T>A                       | ENST00000296043 | L1760Q                      | yes                  | yes                |
|                 | <i>INSR</i>     | 320C>T                        | ENST00000302850 | T107M                       | no                   | yes                |
|                 | <i>MAGEH1</i>   | 557G>A                        | ENST00000342972 | R186Q                       | no                   | yes                |
|                 | <i>NRAS</i>     | 38G>T                         | ENST00000369535 | G13V                        | no                   | yes                |
|                 | <i>RPL11</i>    | 53G>C                         | ENST00000374550 | R18P                        | no                   | yes                |
|                 | <i>SATB1</i>    | 1219G>A                       | ENST00000338745 | E407K                       | no                   | yes                |
|                 | <i>SYT10</i>    | 413C>A                        | ENST00000228567 | P138H                       | no                   | yes                |
|                 | <i>VSTM2A</i>   | 46G>A                         | ENST00000407838 | V16I                        | no                   | yes                |
|                 | <i>IFNA10</i>   | 114delG                       | ENST00000357374 | L38fs                       | no                   | yes                |

**Supplementary Table 3. Genomic regions of LOH in diagnostic and relapsed T-ALLs analyzed by whole exome sequencing.**

| Sample   | Chromosome | Start     | End       | Cytoband            | Sample    |
|----------|------------|-----------|-----------|---------------------|-----------|
| T-ALL 15 | 12         | 116408538 | 133768553 | 12q24.21 - 12q24.33 | Relapse   |
| T-ALL 16 | 6          | 30954873  | 31323353  | 6p21.33             | Diagnosis |
| T-ALL 17 | 1          | 949608    | 54644859  | 1p36.33 - 1p32.3    | Diagnosis |
| T-ALL 17 | 1          | 949608    | 120437718 | 1p36.33 - 1p12      | Relapse   |
| T-ALL 17 | 9          | 117713    | 32425910  | 9p24.3 - 9p21.1     | Diagnosis |
| T-ALL 21 | 9          | 214864    | 21816758  | 9p24.3 - 9p21.3     | Diagnosis |

**Supplementary Table 4. *NT5C2* mutations in ALL**

| Sample ID            | Diagnosis | Exon | Predicted amino acid change | Ref. Seq NM_012229 |
|----------------------|-----------|------|-----------------------------|--------------------|
| Relapse T-ALL 4      | T-ALL     | 13   | R367Q                       | 1100G>A            |
| Relapse T-ALL 11     | T-ALL     | 13   | K359Q                       | 1076A>C            |
| Relapse T-ALL 17     | T-ALL     | 13   | R367Q                       | 1100G>A            |
| Relapse T-ALL 17     | T-ALL     | 9    | R238L                       | 713G>T             |
| Relapse T-ALL 22     | T-ALL     | 9    | R238W                       | 712C>T             |
| Relapse T-ALL 29     | T-ALL     | 11   | R291W                       | 871C>T             |
| Relapse T-ALL 35     | T-ALL     | 13   | R367Q                       | 1100G>A            |
| Relapse T-ALL 37     | T-ALL     | 15   | D407A                       | 1219A>C            |
| Relapse T-ALL 30     | T-ALL     | 17   | Q523*                       | 1567C>T            |
| Relapse pre-B ALL 16 | pre-B ALL | 13   | R367Q                       | 1100G>A            |
| Relapse T-ALL B11    | T-ALL     | 13   | R367Q                       | 1100G>A            |
| Relapse T-ALL B15    | T-ALL     | 13   | R367Q                       | 1100G>A            |
| Relapse T-ALL B30    | T-ALL     | 13   | R367Q                       | 1100G>A            |
| Relapse T-ALL B37    | T-ALL     | 13   | R367Q                       | 1100G>A            |
| Relapse T-ALL B39    | T-ALL     | 13   | R367Q                       | 1100G>A            |
| Relapse T-ALL B44    | T-ALL     | 13   | R367Q                       | 1100G>A            |
| Relapse T-ALL B48    | T-ALL     | 13   | R367Q                       | 1100G>A            |
| Relapse T-ALL B52    | T-ALL     | 13   | R367Q                       | 1100G>A            |
| Relapse T-ALL B53    | T-ALL     | 13   | R367Q                       | 1100G>A            |
| Relapse T-ALL B9     | T-ALL     | 9    | R238W                       | 712C>T             |
| Relapse T-ALL B29    | T-ALL     | 9    | R238W                       | 712C>T             |
| Relapse T-ALL B64    | T-ALL     | 9    | R238W                       | 712C>T             |
| Relapse T-ALL B9     | T-ALL     | 13   | L375F                       | 1123C>T            |
| Relapse T-ALL B64    | T-ALL     | 13   | L375F                       | 1123C>T            |

**Supplementary Table 5. Correlative clinical data on *NT5C2* mutated relapsed T-ALLs treated in AIEOP clinical trials.**

| Sample   | Age (years) | Gender | Initial ALL Treatment | Duration of first complete remission (months) | Karyotype                                                                         |
|----------|-------------|--------|-----------------------|-----------------------------------------------|-----------------------------------------------------------------------------------|
| T-ALL 4  | 6           | M      | AIEOP LAL91           | 24.9                                          | 46,XY                                                                             |
| T-ALL 11 | NA          | M      | AIEOP LAL95           | 3.6                                           | 46,XY(50%)/46,XY, del19(p22), -19, +der(19), t(9;19)(q22;q12)(20%)/47,XY, +8(30%) |
| T-ALL 17 | 8           | M      | AIEOP LAL95           | 11.6                                          | NA                                                                                |
| T-ALL 29 | 6           | M      | AIEOP LAL91           | 25.0                                          | NA                                                                                |
| T-ALL 30 | 9           | M      | AIEOP LAL2000         | 18.5                                          | NA                                                                                |
| T-ALL 35 | 6           | F      | AIEOP LAL2000         | 14.5                                          | NA                                                                                |
| T-ALL 37 | 11          | M      | AIEOP LAL2000         | 26.1                                          | NA                                                                                |

Clinical protocols are described in Conter *et al.* J. Clin Oncol 1997; 15:2786-91 (AIEOP LAL91); Lo Nigro *et al.* Medical and Pediatric Oncol 2000; 35:449-455 (AIEOP LAL95) and Cario *et al.* Blood 2010; 115:5393-5397 (AIEOP LAL2000)



**Supplementary Table 6. Correlative clinical and molecular data on *NT5C2* mutated relapsed T-ALLs in BFM based protocols**

| Sample            | Age at initial diagnosis (years) | Gender | Initial ALL treatment               | Duration of first complete remission (months) | Time of relapse (on/off treatment) | Site of relapse       | Immunophenotype | <i>TP53</i> mutation and/or deletion |
|-------------------|----------------------------------|--------|-------------------------------------|-----------------------------------------------|------------------------------------|-----------------------|-----------------|--------------------------------------|
| Relapse T-ALL B9  | 12.08                            | male   | ALL-BFM 95, high risk arm           | 12.93                                         | on treatment                       | isolated BM           | cortical T-ALL  | no                                   |
| Relapse T-ALL B11 | 7.67                             | female | ALL-BFM 95, high risk arm           | 9.33                                          | on treatment                       | combined BM/CNS       | T-ALL           | no                                   |
| Relapse T-ALL B15 | 6.75                             | male   | ALL-BFM 95, high risk arm           | 19.40                                         | on treatment                       | isolated BM           | cortical T-ALL  | no                                   |
| Relapse T-ALL B29 | 14.33                            | male   | COALL 06-97, high risk arm          | 10.47                                         | on treatment                       | combined BM/other     | T-ALL           | no                                   |
| Relapse T-ALL B30 | 12.17                            | male   | ALL-BFM 2000, intermediate risk arm | 11.93                                         | on treatment                       | isolated BM           | cortical T-ALL  | no                                   |
| Relapse T-ALL B37 | 2.92                             | male   | ALL-BFM 2000, intermediate risk arm | 20.23                                         | on treatment                       | combined BM/Testis    | cortical T-ALL  | no                                   |
| Relapse T-ALL B39 | 5.08                             | male   | NHL-BFM 95                          | 16.07                                         | on treatment                       | isolated BM           | cortical T-ALL  | no                                   |
| Relapse T-ALL B44 | 4.67                             | male   | Euro-LB 02                          | 19.13                                         | on treatment                       | combined BM/other     | pre-T ALL       | no                                   |
| Relapse T-ALL B48 | 15.25                            | male   | ALL-BFM 2000, high risk arm         | 15.77                                         | on treatment                       | isolated BM           | T-ALL           | no                                   |
| Relapse T-ALL B52 | 13.67                            | female | ALL-BFM 2000, intermediate risk arm | 13.63                                         | on treatment                       | combined BM/CNS       | T-ALL           | no                                   |
| Relapse T-ALL B53 | 11.00                            | male   | ALL-BFM 2000, intermediate risk arm | 15.17                                         | on treatment                       | isolated BM           | cortical T-ALL  | no                                   |
| Relapse T-ALL B64 | 2.58                             | female | Euro-LB 02                          | 14.80                                         | on treatment                       | combined BM/CNS/other | T-ALL           | no                                   |

Clinical protocols are described in Mörücke *et al.* Blood 2008; 111:4477-4489 (NHL/ALL-BFM 95); Escherich *et al.* Hematologica 2011; 96:854-862 (COALL 06-97); Scherey *et al.* Pediatric Blood Cancer 2010; 54:952-958 (ALL-BFM2000); Oschlies *et al.* A, J Surg Pathol 2011; 35:836-44 (Euro-LB 02)

**Supplementary Table 7. Correlative clinical data on rescue treatment for NT5C2 mutated relapsed T-ALLs in BFM based protocols**

| Sample            | Relapse treatment protocol | Relapse risk group/treatment arm | Cytological response | Stem cell transplantation in second complete remission | Event                            | Death |
|-------------------|----------------------------|----------------------------------|----------------------|--------------------------------------------------------|----------------------------------|-------|
| Relapse T-ALL B9  | ALL-REZ BFM 96             | S4 / high risk                   | early                | no                                                     | second relapse                   | yes   |
| Relapse T-ALL B11 | ALL-REZ BFM 96             | S4 / high risk                   | normal               | yes                                                    | secondary malignancy             | yes   |
| Relapse T-ALL B15 | ALL-REZ BFM 96             | S4 / high risk                   | nonresponse          | no                                                     | cytological nonresponse          | yes   |
| Relapse T-ALL B29 | ALL-REZ BFM 2002 pilot     | S4 / high risk                   | nonresponse          | no                                                     | cytological nonresponse          | yes   |
| Relapse T-ALL B30 | ALL-REZ BFM 2002 pilot     | S4 / high risk                   | late                 | yes                                                    | second relapse                   | yes   |
| Relapse T-ALL B37 | ALL-REZ BFM 2002           | S4 / high risk                   | early                | yes                                                    | in CCR                           | no    |
| Relapse T-ALL B39 | ALL-REZ BFM 2002           | S4 / high risk                   | normal               | yes                                                    | treatment related death in CR    | yes   |
| Relapse T-ALL B44 | ALL-REZ BFM 2002           | S4 / high risk                   | early                | yes                                                    | second relapse                   | yes   |
| Relapse T-ALL B48 | ALL-REZ BFM 2002           | S4 / high risk                   | nonresponse          | no                                                     | cytological nonresponse          | yes   |
| Relapse T-ALL B52 | ALL-REZ BFM 2002           | S4 / high risk                   | early                | yes                                                    | second relapse                   | yes   |
| Relapse T-ALL B53 | ALL-REZ BFM 2002           | S4 / high risk                   | late                 | no                                                     | second relapse                   | yes   |
| Relapse T-ALL B64 | ALL-REZ BFM 2002           | S4 / high risk                   | n. a.                | no                                                     | early death in induction therapy | yes   |

Clinical protocols are described in Von Stackelberg *et al.* Med Pediatr Oncol 2002; 39: 236 (ALL-REZ BFM 96) and at [clinicaltrials.gov](http://clinicaltrials.gov) (<http://clinicaltrials.gov/show/NCT00114348>) (ALL-REZ BFM 2002)

**Supplementary Table 8. Association of *NT5C2* mutations with clinical characteristics, response, outcome and genetics in T-ALL patients treated in BFM based protocols.**

| Parameter                                            | Variable                                                             | wildtype |       | mutation |       | p            |
|------------------------------------------------------|----------------------------------------------------------------------|----------|-------|----------|-------|--------------|
|                                                      |                                                                      | n        | %     | n        | %     |              |
| Total                                                |                                                                      | 55       | 100.0 | 12       | 100.0 |              |
| <b>Clinical characteristics</b>                      |                                                                      |          |       |          |       |              |
| Gender                                               | male                                                                 | 41       | 74.5  | 9        | 75.0  | 1.000        |
|                                                      | female                                                               | 14       | 25.5  | 3        | 25.0  |              |
| Age at relapse diagnosis                             | < 5 years                                                            | 9        | 16.4  | 2        | 16.7  | 1.000        |
|                                                      | ≥ 5 and < 10 years                                                   | 17       | 30.9  | 4        | 33.3  |              |
|                                                      | ≥ 10 years                                                           | 29       | 52.7  | 6        | 50.0  |              |
| Age at initial diagnosis                             | < 5 years                                                            | 13       | 23.6  | 3        | 25.0  | 0.662        |
|                                                      | ≥ 5 and < 10 years                                                   | 21       | 38.2  | 3        | 25.0  |              |
|                                                      | ≥ 10 years                                                           | 21       | 38.2  | 6        | 50.0  |              |
| Time of relapse <sup>1</sup>                         | very early                                                           | 25       | 45.5  | 9        | 75.0  | 0.079        |
|                                                      | early                                                                | 16       | 29.1  | 3        | 25.0  |              |
|                                                      | late                                                                 | 14       | 25.5  | 0        | 0.0   |              |
| Time of relapse <sup>1</sup>                         | very early or early                                                  | 41       | 74.5  | 12       | 100.0 | <b>0.058</b> |
|                                                      | late                                                                 | 14       | 25.5  | 0        | 0.0   |              |
| Time of relapse                                      | on treatment                                                         | 30       | 54.5  | 12       | 100.0 | <b>0.002</b> |
|                                                      | off treatment                                                        | 25       | 45.5  | 0        | 0.0   |              |
| Duration of CR1                                      | median (years)                                                       |          | 1.5   |          | 1.21  | 0.540        |
| Site of relapse <sup>2</sup>                         | BM isolated                                                          | 41       | 74.5  | 6        | 50.0  | 0.160        |
|                                                      | BM combined                                                          | 14       | 25.5  | 6        | 50.0  |              |
| Immunophenotype at relapse                           | T-ALL                                                                | 22       | 40.0  | 5        | 41.7  | 0.365        |
|                                                      | pre-T ALL                                                            | 15       | 27.3  | 1        | 8.3   |              |
|                                                      | cortical T-ALL                                                       | 18       | 32.7  | 6        | 50.0  |              |
| <b>Treatment, response and outcome after relapse</b> |                                                                      |          |       |          |       |              |
| Relapse treatment                                    | ALL-REZ BFM 95/96                                                    | 20       | 36.4  | 3        | 25.0  | 0.532        |
|                                                      | ALL-REZ BFM 2002                                                     | 35       | 63.6  | 9        | 75.0  |              |
| HSCT after relapse                                   | no                                                                   | 25       | 45.5  | 6        | 50.0  | 1.000        |
|                                                      | yes                                                                  | 30       | 54.5  | 6        | 50.0  |              |
| Cytological response <sup>3</sup>                    | early                                                                | 20       | 39.2  | 4        | 36.4  | 0.597        |
|                                                      | normal                                                               | 12       | 23.5  | 2        | 18.2  |              |
|                                                      | late                                                                 | 3        | 5.9   | 2        | 18.2  |              |
|                                                      | non-response                                                         | 16       | 31.4  | 3        | 27.3  |              |
|                                                      | no data                                                              |          | 4     |          | 1     |              |
| Induction of 2 <sup>nd</sup> remission               | 2 <sup>nd</sup> CR achieved                                          | 36       | 65.5  | 8        | 66.7  | 1.000        |
|                                                      | no 2 <sup>nd</sup> CR achieved                                       | 19       | 34.5  | 4        | 33.3  |              |
| Event                                                | in CCR                                                               | 15       | 27.3  | 1        | 8.3   | 0.267        |
|                                                      | any event                                                            | 40       | 72.7  | 11       | 91.7  |              |
| Event                                                | in CCR                                                               | 15       | 27.3  | 1        | 8.3   | 0.234        |
|                                                      | death in CR                                                          | 7        | 12.7  | 1        | 8.3   |              |
|                                                      | secondary malignancy                                                 | 0        | 0.0   | 1        | 8.3   |              |
|                                                      | second relapse                                                       | 14       | 25.5  | 5        | 41.7  |              |
|                                                      | cytological nonresponse                                              | 16       | 29.1  | 3        | 25.0  |              |
|                                                      | death in induction                                                   | 3        | 5.5   | 1        | 8.3   |              |
| Event                                                | in CCR                                                               | 15       | 27.3  | 1        | 8.3   | 0.341        |
|                                                      | early event (death in ind., non-resp.)                               | 21       | 38.2  | 7        | 58.3  |              |
|                                                      | late event (2 <sup>nd</sup> rel., 2 <sup>nd</sup> mal., death in CR) | 19       | 34.5  | 4        | 33.3  |              |
| <b>Genetics at relapse</b>                           |                                                                      |          |       |          |       |              |
| <i>TP53</i> mutation and/or deletion                 | no                                                                   | 49       | 89.1  | 12       | 100.0 | 0.582        |
|                                                      | yes                                                                  | 6        | 10.9  | 0        | 0.0   |              |
| <i>PTEN</i> mutation                                 | no                                                                   | 51       | 92.7  | 10       | 83.3  | 0.291        |
|                                                      | yes                                                                  | 4        | 7.3   | 2        | 16.7  |              |
| <i>CDKN2A/2B</i> deletion                            | no                                                                   | 17       | 30.9  | 3        | 25.0  | 1.000        |
|                                                      | yes                                                                  | 38       | 69.1  | 9        | 75.0  |              |
| <i>SIL/TAL</i> fusion                                | no                                                                   | 52       | 94.5  | 9        | 75.0  | 0.066        |
|                                                      | yes                                                                  | 3        | 5.5   | 3        | 25.0  |              |
| <i>NOTCH1</i> mutation                               | no                                                                   | 25       | 48.1  | 5        | 41.7  | 0.757        |
|                                                      | yes                                                                  | 27       | 51.9  | 7        | 58.3  |              |
|                                                      | no data                                                              |          | 3     |          | 0     |              |

Supplementary Table 8 continued

|                            |                                           |           |      |           |      |       |
|----------------------------|-------------------------------------------|-----------|------|-----------|------|-------|
| <i>FBXW7</i> mutation      | no                                        | <b>40</b> | 76.9 | <b>10</b> | 83.3 | 1.000 |
|                            | yes                                       | <b>12</b> | 23.1 | <b>2</b>  | 16.7 |       |
|                            | no data                                   |           | 3    |           | 0    |       |
| <b>Frontline treatment</b> |                                           |           |      |           |      |       |
| Treatment protocol         | ALL-BFM <sup>4</sup>                      | <b>32</b> | 61.5 | <b>8</b>  | 66.7 | 0.241 |
|                            | COALL <sup>5</sup>                        | <b>14</b> | 26.9 | <b>1</b>  | 8.3  |       |
|                            | BFM - lymphoblastic lymphoma <sup>6</sup> | <b>6</b>  | 11.5 | <b>3</b>  | 25   |       |
|                            | no data                                   |           | 3    |           | 0    |       |
| Treatment intensity        | high-risk treatment <sup>7</sup>          | <b>19</b> | 59.4 | <b>5</b>  | 55.6 | 1.000 |
|                            | non high-risk treatment <sup>8</sup>      | <b>13</b> | 40.6 | <b>4</b>  | 44.4 |       |
|                            | no data                                   |           | 23   |           | 3    |       |

<sup>1</sup>)time of relapse: very early, <18 months after initial diagnosis of ALL; early, ≥18 months after initial diagnosis of ALL; late, ≥6 months after completion of primary treatment. <sup>2</sup>)site of relapse: isolated BM, no evidence of extramedullary disease; combined BM, more than 5% leukemic cells in the BM combined with CNS, testis, or other extramedullary disease. <sup>3</sup>)cytologic response: early, remission after first induction course; normal, remission after second induction course; late, remission after 1<sup>st</sup> R2 block/day 15 protocol II-IDA; non-response, no remission after 1<sup>st</sup> R1 block/day 29 protocol II-IDA. Cytologic remission was defined as less than 5% leukemic blasts in regenerating bone marrow, no peripheral blasts cells and no extramedullary involvement. <sup>4</sup>)ALL-BFM includes patients treated according to protocols ALL-BFM 90, ALL-BFM 95 and ALL-BFM 2000. <sup>5</sup>)COALL includes patients treated according to protocols CoALL 05-92, CoALL 06-97 and CoALL 07-03. <sup>6</sup>)BFM - lymphoblastic lymphoma includes patients treated according to protocols NHL-BFM 90, NHL-BFM 95 and Euro-LB 02. <sup>7</sup>)high-risk treatment includes patients treated according to the high risk arm of protocols ALL-BFM 90, ALL-BFM 95, ALL-BFM 2000, CoALL 06-97 and CoALL 07-03. <sup>8</sup>)non high-risk treatment includes patients treated according to the standard risk or intermediate risk arm of protocols ALL-BFM 90, ALL-BFM 95 and ALL-BFM 2000. Abbreviations: BM, bone marrow; CR2, second complete remission; CCR, complete continuous remission; MRD, minimal residual disease in bone marrow aspiration after induction phase (week 5); HSCT, hematopoietic stem cell transplantation.

**Supplementary Table 9. Association of frontline treatment with *NT5C2* mutations**

| Parameter                                 | Variable                                        | <i>NT5C2</i> wild type |          | <i>NT5C2</i> mutation |       | <i>p</i> <sup>7</sup> |
|-------------------------------------------|-------------------------------------------------|------------------------|----------|-----------------------|-------|-----------------------|
|                                           |                                                 | n                      | %        | n                     | %     |                       |
| Total number of patients investigated     |                                                 | <b>55</b>              |          | <b>12</b>             |       |                       |
| <b>Frontline treatment</b>                |                                                 |                        |          |                       |       |                       |
| Treatment protocol                        | total no. of patients without data <sup>1</sup> | <b>3</b>               |          | <b>0</b>              |       |                       |
|                                           | total no of patients with data                  | <b>52</b>              | 100.0    | <b>12</b>             | 100.0 |                       |
|                                           | ALL-BFM <sup>2</sup>                            | <b>32</b>              | 61.5     | <b>8</b>              | 66.7  | 0.241                 |
|                                           | COALL <sup>3</sup>                              | <b>14</b>              | 26.9     | <b>1</b>              | 8.3   |                       |
| BFM - lymphoblastic lymphoma <sup>4</sup> | <b>6</b>                                        | 11.5                   | <b>3</b> | 25                    |       |                       |
| Treatment intensity                       | total no. of patients without data <sup>1</sup> | <b>23</b>              |          | <b>3</b>              |       |                       |
|                                           | total no of patients with data                  | <b>32</b>              | 100.0    | <b>9</b>              | 100.0 |                       |
|                                           | high-risk treatment <sup>5</sup>                | <b>19</b>              | 59.4     | <b>5</b>              | 55.6  | 1.000                 |
|                                           | non high-risk treatment <sup>6</sup>            | <b>13</b>              | 40.6     | <b>4</b>              | 44.4  |                       |

<sup>1</sup>Patients without data regarding frontline treatment were excluded from the statistical analysis.

<sup>2</sup>ALL-BFM includes patients treated according to protocols ALL-BFM 90, ALL-BFM 95 and ALL-BFM 2000.

<sup>3</sup>COALL includes patients treated according to protocols CoALL 05-92, CoALL 06-97 and CoALL 07-03.

<sup>4</sup>BFM - lymphoblastic lymphoma includes patients treated according to protocols NHL-BFM 90, NHL-BFM 95 and Euro-LB 02.

<sup>5</sup>high-risk treatment includes patients treated according to the high risk arm of protocols ALL-BFM 90, ALL-BFM 95, ALL-BFM 2000, CoALL 06-97 and CoALL 07-03.

<sup>6</sup>non high-risk treatment includes patients treated according to the standard risk or intermediate risk arm of protocols ALL-BFM 90, ALL-BFM 95 and ALL-BFM 2000.

<sup>7</sup>Equality of categorical variables was analyzed by Fisher's exact test (2-sided).

**Supplementary Table 10. Multivariate binary logistic regression with time of relapse (on/off treatment) as outcome variable**

| Variable                                                |                              | No of patients <sup>1</sup> | Regression coefficient beta | e <sup>β</sup> (odds ratio) | p-Value | Nagelkerkes R <sup>2</sup> |
|---------------------------------------------------------|------------------------------|-----------------------------|-----------------------------|-----------------------------|---------|----------------------------|
| <i>Model with NT5C2 mutation and frontline protocol</i> |                              |                             |                             |                             |         |                            |
| NT5C2                                                   | wt                           | 12                          |                             | 1                           | <0.001  |                            |
|                                                         | mutation                     | 52                          | 20.961                      | 1 268 199 318               |         |                            |
| frontline protocol                                      | BFM - lymphoblastic lymphoma | 9                           |                             | 1                           | 0.803   | 0.246                      |
|                                                         | ALL-BFM                      | 40                          | 0.378                       | 1.462                       |         |                            |
|                                                         | COALL                        | 15                          | 0                           | 1                           |         |                            |
| <i>Best Model</i>                                       |                              |                             |                             |                             |         |                            |
| NT5C2                                                   | wt                           | 12                          |                             | 1                           | <0.001  | 0.238                      |
|                                                         | mutation                     | 52                          | 20.971                      | 1 281 238 668               |         |                            |

<sup>1</sup>The total number of patients included in the analysis is 64 of 67 ALL-REZ BFM T-ALL relapse patients. Three patients were excluded because of missing data on frontline treatment.

**Supplementary Table 11. Nucleoside analog IC50 values ( $\mu\text{M}$ ) of T-ALL cell lines expressing relapse associated *NT5C2* mutant alleles**

|                       | 6-mercaptopurine |        |                       | 6-thioguanine |        |
|-----------------------|------------------|--------|-----------------------|---------------|--------|
|                       | CCRF-CEM         | CUTLL1 |                       | CCRF-CEM      | CUTLL1 |
| RFP*                  | 3.07             | 0.71   | RFP*                  | 0.77          | 1.18   |
| NT5C2 WT <sup>#</sup> | 3.54             | 0.41   | NT5C2 WT <sup>#</sup> | 1.10          | 1.39   |
| NT5C2 R367Q           | 5.57             | > 10   | NT5C2 K367Q           | > 10          | 2.6    |
| NT5C2 R359Q           | 6.47             | > 10   | NT5C2 R359Q           | > 10          | 3.37   |
| NT5C2 D407A           | 5.67             | > 10   | NT5C2 D407A           | 10            | 2.56   |

\* RFP, empty vector control

<sup>#</sup> NT5C2 WT, wild type NT5C2
